# Supplementary material
Source: MDPI journal article supplement (https://www.mdpi.com/2073-4344/9/2/183)
Supplement: s1 [file s1]

## Supplementary material

# A Facile Fabrication of Supported Ni/SiO<sub>2</sub> Catalysts for Dry Reforming of Methane with Remarkably Enhanced Catalytic Performance

Yan Xu <sup>1,2</sup>, Qiang Lin <sup>1</sup>, Bing Liu <sup>1</sup>, Feng Jiang <sup>1</sup>, Yuebing Xu <sup>1</sup> and Xiaohao Liu <sup>1,\*</sup>

<sup>1</sup> Department of Chemical Engineering, School of Chemical and Material Engineering, Jiangnan University, 214122 Wuxi, China; xuyan8787@163.com (Y.X.); lq15355615253@163.com (Q.L.); liubing@jiangnan.edu.cn (B.L.); jiangfeng@jiangnan.edu.cn (F.J.); xuyuebing@jiangnan.edu.cn (Y.X.)

<sup>2</sup> School of Chemistry and Chemical Engineering, Xuzhou University of Technology, 221018 Xuzhou, China

\* Correspondence: liuxh@jiangnan.edu.cn;

### *Calculation of the Equilibrium Conversion in DRM Reaction*

**Table S1.** The equilibrium conversions of CH<sub>4</sub> and CO<sub>2</sub>, H<sub>2</sub>/CO molar ratio, and selectivity to H<sub>2</sub>O calculated by HSC chemistry 6.0.

| Feeding gas and product gas                            | CH <sub>4</sub> | CO <sub>2</sub> | N <sub>2</sub> | H <sub>2</sub> | CO   | H <sub>2</sub> O |
|--------------------------------------------------------|-----------------|-----------------|----------------|----------------|------|------------------|
| Initial molar composition (mol)                        | 45.0            | 45.0            | 10.0           | 0              | 0    | 0                |
| Equilibrium composition (mol)                          | 4.14            | 2.18            | 10.0           | 79.8           | 83.7 | 1.96             |
| Conversions of CH <sub>4</sub> and CO <sub>2</sub> (%) | 91.0            | 95.0            | ---            | ---            | ---  | ---              |
| Equilibrium H <sub>2</sub> /CO molar ratio             | ---             | ---             | ---            | 0.95           | ---  | ---              |
| Selectivity to H <sub>2</sub> O (%)                    | ---             | ---             | ---            | ---            | ---  | 2.3              |

Reaction conditions: 800 °C, 1 bar.

In order to evaluate the catalytic activity in DRM reaction, equilibrium conversions of CH<sub>4</sub> and CO<sub>2</sub> were calculated by software HSC chemistry 6.0. The initial composition of feeding gas and product gas was set at CH<sub>4</sub> (45 mol), CO<sub>2</sub> (45 mol), N<sub>2</sub> (10 mol), H<sub>2</sub> (0 mol), CO (0 mol), and H<sub>2</sub>O (0 mol), while operating conditions were set at 800 °C and 1 bar. The calculated results are shown in Table S1.

**Table S2.** BET surface area, pore volume and pore size of the SiO<sub>2</sub> support and as-prepared Ni/SiO<sub>2</sub> catalysts.

| Sample                                  |         | SiO <sub>2</sub> support | Ni/SiO <sub>2</sub> -0/0 | Ni/SiO <sub>2</sub> -0/1 | Ni/SiO <sub>2</sub> -2/0 | Ni/SiO <sub>2</sub> -2/1 |
|-----------------------------------------|---------|--------------------------|--------------------------|--------------------------|--------------------------|--------------------------|
| BET surface area<br>(m <sup>2</sup> /g) | Fresh   | 188.8                    | 161.2                    | 159.7                    | 172.2                    | 175.1                    |
|                                         | Reduced | -                        | 162.6                    | 167.0                    | 169.9                    | 165.9                    |
|                                         | Spent   | -                        | 89.9                     | 95.0                     | 121.0                    | 118.3                    |
| Pore volume<br>(cm <sup>3</sup> /g)     | Fresh   | 1.17                     | 0.97                     | 0.81                     | 0.84                     | 0.80                     |
|                                         | Reduced | -                        | 0.99                     | 0.99                     | 0.82                     | 0.88                     |
|                                         | Spent   | -                        | 0.37                     | 0.36                     | 0.39                     | 0.50                     |
| Pore size<br>(nm)                       | Fresh   | 17.6                     | 15.6                     | 17.5                     | 15.5                     | 16.2                     |
|                                         | Reduced | -                        | 15.5                     | 15.5                     | 15.5                     | 15.5                     |
|                                         | Spent   | -                        | 17.5                     | 16.2                     | 13.8                     | 16.8                     |

Table S2 shows the BET surface area, pore volume and pore size of the SiO<sub>2</sub> support and as-prepared Ni/SiO<sub>2</sub> catalysts. It can be seen clearly that, compared with SiO<sub>2</sub> support, the BET surface area, pore volume and pore size slightly decreased over all prepared fresh and reduced Ni/SiO<sub>2</sub> catalysts. However, they became distinctly different after 50-hours of reaction, which should be ascribed to the carbon deposits on the catalyst. The Ni/SiO<sub>2</sub>-0/0 with the largest Ni nanoparticle size led to the decrease of surface area to the largest extent from 162.6 to 89.9 m<sup>2</sup>/g. In contrast, the Ni/SiO<sub>2</sub>-2/1 prepared by the combustion method with both C<sub>2</sub>H<sub>5</sub>NO<sub>2</sub> as the fuel and NH<sub>4</sub>NO<sub>3</sub> as the combustion improver gave the lowest decrease in the BET surface area from 165.9 to 118.3 m<sup>2</sup>/g due to its smallest Ni nanoparticle size.

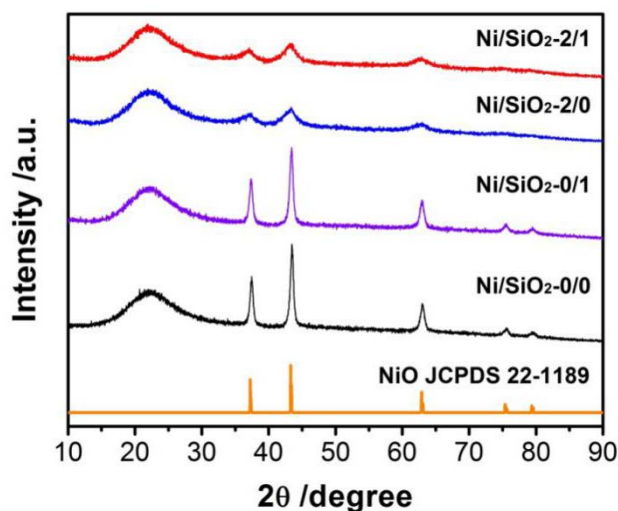

**Fig. S1** XRD patterns of fresh Ni/SiO<sub>2</sub> catalysts prepared with the combustion method by using different ratios of C<sub>2</sub>H<sub>5</sub>NO<sub>2</sub> to NH<sub>4</sub>NO<sub>3</sub>.

Fig. S1 shows the XRD patterns of as-prepared fresh Ni/SiO<sub>2</sub> catalysts. It is clear that all fresh Ni/SiO<sub>2</sub> catalysts exhibit the apparent diffraction peaks at  $2\theta$  values of  $37.3^\circ$ ,  $43.2^\circ$ ,  $63.0^\circ$ ,  $75.4^\circ$ , and  $79.4^\circ$  assigned to the NiO (JCPDS 22-1189). In the case of Ni/SiO<sub>2</sub>-0/1, the presence of only NH<sub>4</sub>NO<sub>3</sub> as the combustion improver did not obviously affect the intensity of sharp peaks compared to the Ni/SiO<sub>2</sub>-0/0 which indicates the large NiO crystallite nanoparticles. In contrast, the addition of C<sub>2</sub>H<sub>5</sub>NO<sub>2</sub> fuel brought about a remarkable decrease in the nanoparticle size of NiO as reflected by much weaker and broader diffraction peaks over Ni/SiO<sub>2</sub>-2/0 and Ni/SiO<sub>2</sub>-2/1 catalysts.

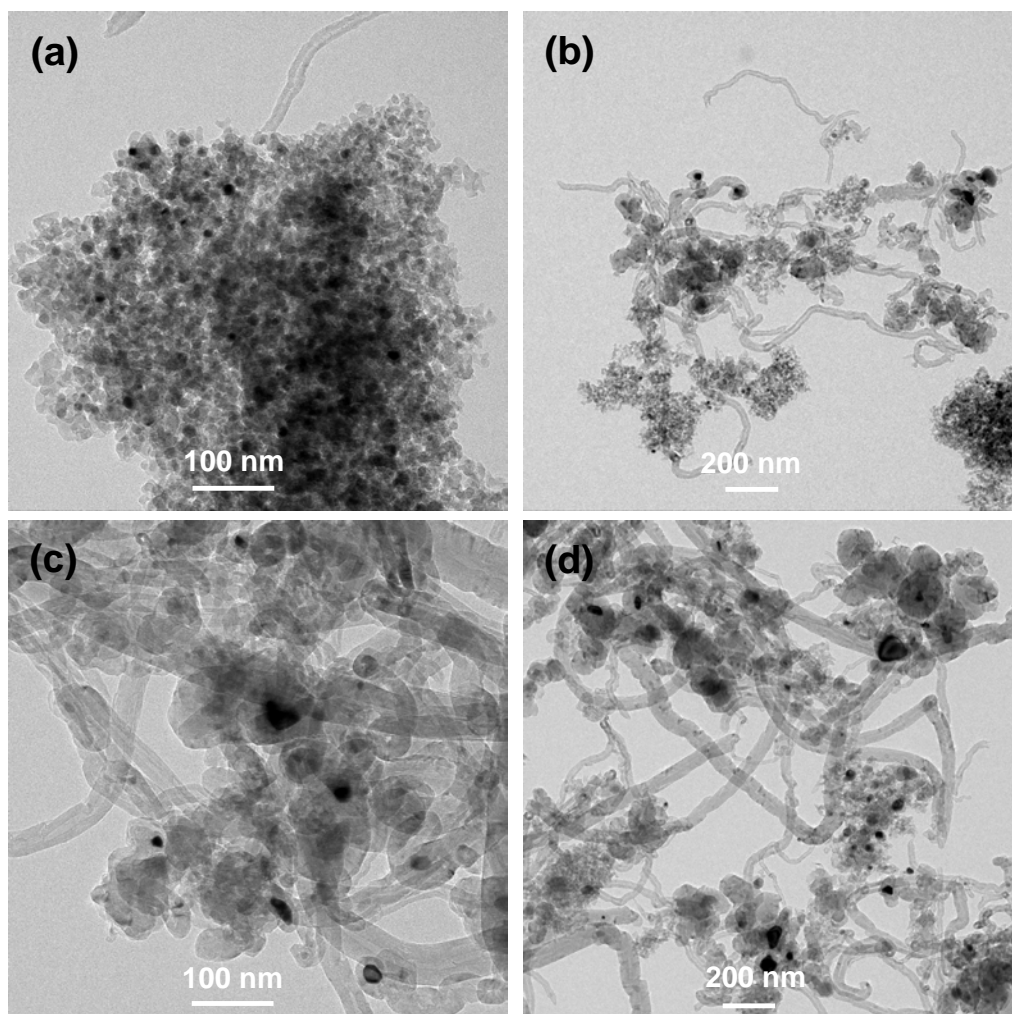

**Fig. S2** TEM images of spent Ni/SiO<sub>2</sub>-0/0 catalyst ((a) and (b)) and Ni/SiO<sub>2</sub>-2/1 catalyst ((c) and (d)) after 50-hours of reaction.
